# Supplementary material for: Effect of water content on stratum corneum penetration mechanism of W/O type microemulsions
Source: Royal Society of Chemistry journal article supplement (doi:10.1039/d3ra02546b), 2023-01-01
Supplement: d3ra02546b1.pdf [file d3ra02546b1.pdf]

## Supporting Information

### Effect of water content on stratum corneum penetration mechanism of W/O type microemulsions

Erika Nakamura,<sup>a</sup> and Hiroki Iwase,<sup>b</sup> and Hiroshi Arima-Osonoi,<sup>b</sup> and Mina Sakuragi<sup>\*a</sup>

<sup>a</sup>Faculty of Engineering, Department of Nanoscience, Sojo University, 4-22-1 Ikeda, Nishi-ku, Kumamoto City 860-0082

<sup>b</sup>Neutron Science and Technology Center, Comprehensive Research Organization for Science and Society, Tokai, Ibaraki, 319-1106, Japan

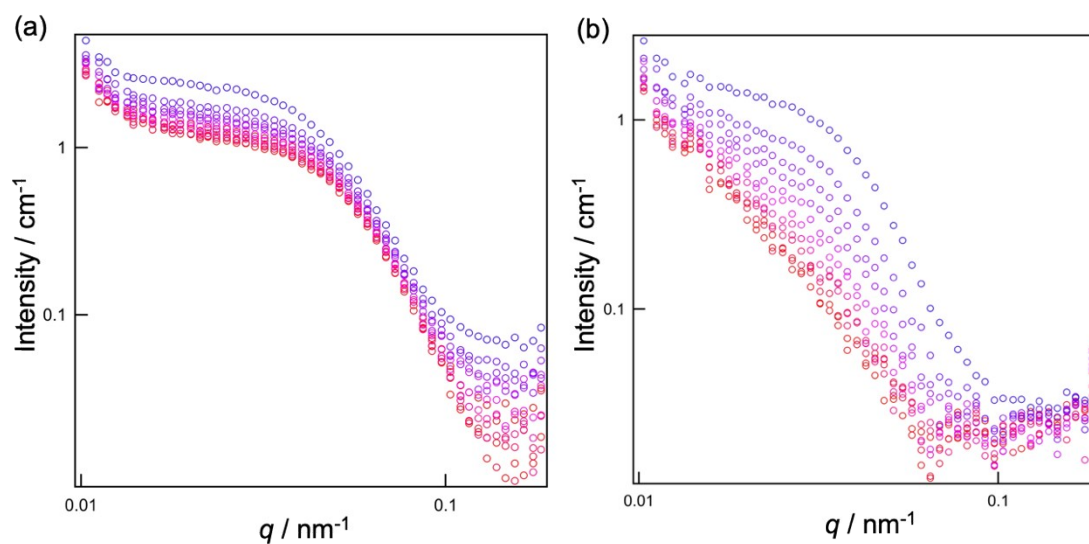

Fig. S1 Change of SAXS profiles from blue to red over time in d-MEs applied to (a) the dry SC and (b) hydrated SC.
